# Supplementary material for: Antibiotic Susceptibility and Molecular Typing of Invasive Haemophilus influenzae Isolates, with Emergence of Ciprofloxacin Resistance, 2017–2021, Italy
Source: MDPI journal article supplement (doi:10.3390/microorganisms11020315), 2023-01-26
Supplement: s1 [file s1]

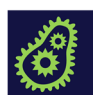

Article

# Antibiotic Susceptibility and Molecular Typing of Invasive *Haemophilus influenzae* Isolates, with Emergence of Ciprofloxacin Resistance, 2017–2021, Italy

Maria Giufrè <sup>1,\*</sup>, Rita Cardines <sup>1</sup>, Manuela Marra <sup>2</sup>, Maria Carollo <sup>2</sup>, Marina Cerquetti <sup>1</sup> and Paola Stefanelli <sup>1</sup>

<sup>1</sup> Department of Infectious Diseases, Istituto Superiore di Sanità, 00161 Rome, Italy

<sup>2</sup> Core Facilities Technical-Scientific Service (FAST), Istituto Superiore di Sanità, 00161 Rome, Italy

\* Correspondence: maria.giufre@iss.it

**Table S1.** List of Sequence type by serotype, grouped by Clonal complex.

| NTHi    |      |    | Capsulated |      |    |
|---------|------|----|------------|------|----|
| CC (n)  | ST   | n  | CC (n)     | ST   | n  |
| 3 (20)  | 14   | 6  | Hia        |      |    |
|         | 102  | 2  | —          | 4    | 1  |
|         | 136  | 2  | 23 (3)     | 23   | 2  |
|         | 143  | 1  |            | 2053 | 1  |
|         | 180  | 1  | Hib        |      |    |
|         | 1034 | 4  | 6 (48)     | 6    | 38 |
|         | 1524 | 3  |            | 78   | 1  |
|         | 2031 | 1  |            | 95   | 1  |
| 11 (18) | 103  | 15 |            | 101  | 1  |
|         | 142  | 1  |            | 190  | 1  |
|         | 145  | 1  |            | 227  | 3  |
|         | 644  | 1  |            | 641  | 2  |
| 12 (6)  | 12   | 5  |            | 662  | 1  |
|         | 786  | 1  | 222 (1)    | 116  | 1  |
| 34 (1)  | 34   | 2  | Hie        |      |    |
| 41 (1)  | 41   | 1  | 18 (3)     | 69   | 3  |
| 57 (1)  | 57   | 2  | Hif        |      |    |
| 107 (4) | 107  | 2  | 105 (1)    | 105  | 1  |
|         | 159  | 1  | 124 (30)   | 124  | 26 |
|         | 1218 | 1  |            | 598  | 4  |
| 155 (1) | 155  | 1  |            |      |    |
| 165 (1) | 165  | 1  |            |      |    |
| 210 (1) | 2129 | 1  |            |      |    |
| 390 (1) | 834  | 1  |            |      |    |
| 393 (2) | 1850 | 2  |            |      |    |
| 395 (4) | 388  | 4  |            |      |    |
| 396 (1) | 396  | 1  |            |      |    |
| 422 (2) | 422  | 1  |            |      |    |
|         | 1667 | 1  |            |      |    |
| 425 (1) | 425  | 1  |            |      |    |
| 487 (3) | 160  | 3  |            |      |    |
| 513 (1) | 513  | 1  |            |      |    |
| 746 (1) | 716  | 1  |            |      |    |
| 836 (5) | 836  | 5  |            |      |    |

---

|          |      |    |    |
|----------|------|----|----|
| 1025 (1) | 1025 | 1  |    |
| –        | 184  | 1  |    |
| –        | 760  | 1  |    |
| –        | 919  | 1  |    |
| –        | 943  | 1  |    |
| –        | 946  | 1  |    |
| –        | 947  | 1  |    |
| –        | 949  | 1  |    |
| –        | 1390 | 1  |    |
| –        | 1412 | 1  |    |
| –        | 2027 | 1  |    |
| Total    |      | 88 | 87 |

---

CC, clonal complex; ST, sequence type.
